# Supplementary material
Source: Springer Nature journal article supplement (https://www.springermedizin.de/resource/supplementary/12967_2013_1651_MOESM7_ESM.pdf/9574552)

**A. Fat only**

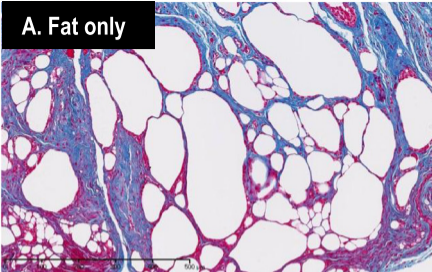

**B. Fat + ADRC ( $\times 1$ )**

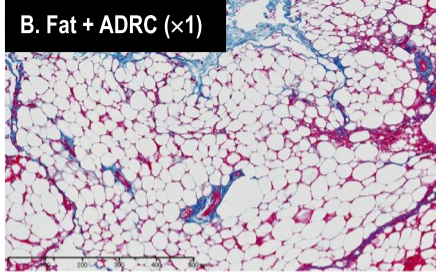

**C. Fat + ADRC ( $\times 5$ )**

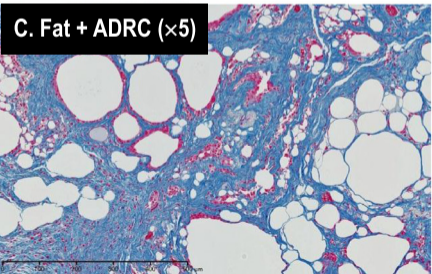

**D. Fat + ADRC ( $\times 10$ )**

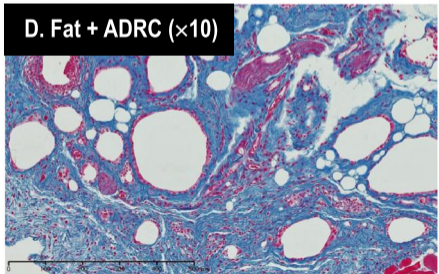

Supplement: MOESM7 [file 9574552]
